# Supplementary material for: Transcriptomic Insights into Innate Immunity Responding to Red Rot Disease in Red Alga Pyropia yezoensis
Source: MDPI journal article supplement (doi:10.3390/ijms20235970), 2019-11-27
Supplement: s1 [file s1]

**Fig S1.** Phylogenetic analysis of C-type lectin proteins in *Pyr. yezoensis*

The maximum likelihood tree of C-type lectin proteins was constructed based on full-length protein sequences from *Arabidopsis thaliana*, *Oryza sativa*, *Nannoschlothea gaditana*, *Chlamydomonas reinhardtii*, *Porphyra umbilicalis* and *Pyr. yezoensis*. *Pyr. yezoensis* C-lectin py02002.t1 was highlighted. Corresponding protein structure shown next to the phylogenetic tree. The lines represent the full length of proteins and colored box represent the domains.

**Fig S2.** Phylogenetic analysis of L-type lectin proteins in *Pyr. yezoensis*

The maximum likelihood tree of L-type lectin proteins was constructed based on full-length protein sequences from *Arabidopsis thaliana*, *Oryza sativa*, *Chondrus crispus*, *Porphyra umbilicalis*, *Ectocarpus siliculosus* and *Pyr. yezoensis*. *Pyr. yezoensis* L-lectin was highlighted. Corresponding protein structure shown next to the phylogenetic tree. The lines represent the full length of proteins and colored box represent the domains.

**Fig S3.** Phylogenetic analysis of putative R proteins in *Pyr. yezoensis*

The maximum likelihood tree of putative R proteins was constructed based on full-length protein sequences from *Arabidopsis thaliana*, *Chromochloris zofingiensis*, *Porphyra umbilicalis*, *Ectocarpus siliculosus* and *Pyr. yezoensis*. *Pyr. yezoensis* putative R proteins was highlighted. Corresponding protein structure shown next to the phylogenetic tree. The lines represent the full length of proteins and colored box represent the domains.

**Fig S4.** Phylogenetic analysis of NADPH oxidase in *Pyr. yezoensis*

The maximum likelihood tree of NADPH oxidase was constructed based on full-length protein sequences from *Arabidopsis thaliana*, *Zea mays*, *Oryza sativa*, *Chlamydomonas reinhardtii*, *Chondrus crispus*, *Porphyra umbilicalis*, *Phaeodactylum tricornutum* and *Pyr. yezoensis*. *Pyr. yezoensis* NADPH oxidase py00308.t1 was highlighted.

**Fig S5.** Phylogenetic analysis of cellulase in *Pyr. yezoensis*

The maximum likelihood tree of cellulase was constructed based on full-length protein sequences from *Arabidopsis thaliana*, *Oryza sativa*, *Zea mays*, *Monoraphidium neglectum*, *Micromonas commoda*, *Chondrus crispus*, *Gracilariopsis chorda* and *Pyr. yezoensis*. *Pyr. yezoensis* cellulase py05067.t1 was highlighted.

**Fig S6.** Phylogenetic analysis of protease inhibitor in *Pyr. yezoensis*

The maximum likelihood tree of cellulase was constructed based on full-length protein sequences from *Arabidopsis thaliana*, *Oryza sativa*, *Chromochloris zofingiensis*, *Chlorella variabilis*, *Volvox carterii*, *Chondrus crispus*, *Porphyra umbilicalis* and *Pyr. yezoensis*. *Pyr. yezoensis* cellulase py03343.t1 was highlighted.
