# Supplementary material for: Transcriptomic Insights into Innate Immunity Responding to Red Rot Disease in Red Alga Pyropia yezoensis
Source: MDPI journal article supplement (doi:10.3390/ijms20235970), 2019-11-27
Supplement: s1 [file s1]

Table S1. Proteins sequences used in phylogenetic analysis

| <b>Proteins</b> | <b>Species</b>                    | <b>GenBank accession number</b> |
|-----------------|-----------------------------------|---------------------------------|
| C-type lectin   | <i>Arabidopsis thaliana</i>       | NP_175641.1                     |
|                 | <i>Arabidopsis thaliana</i>       | OAP12328.1                      |
|                 | <i>Oryza sativa</i>               | XP_015617554.1                  |
|                 | <i>Oryza sativa</i>               | XP_015617555.1                  |
|                 | <i>Nannoshloropsis gaditana</i>   | EWM26794.1                      |
|                 | <i>Nannoshloropsis gaditana</i>   | EWM26828.1                      |
|                 | <i>Chlamydomonas reinhardtii</i>  | PNW77785.1                      |
|                 | <i>Chlamydomonas reinhardtii</i>  | PNW73414.1                      |
|                 | <i>Chlamydomonas reinhardtii</i>  | PNW75982.1                      |
|                 | <i>Porphyra umbilicalis</i>       | OSX81057.1                      |
|                 | <i>Porphyra umbilicalis</i>       | OSX70860.1                      |
|                 | <i>Porphyra umbilicalis</i>       | OSX80033.1                      |
| L-type lectin   | <i>Arabidopsis thaliana</i>       | NC_003076.8                     |
|                 | <i>Arabidopsis thaliana</i>       | NC_003074.8                     |
|                 | <i>Oryza sativa</i>               | NC_029264.1                     |
|                 | <i>Oryza sativa</i>               | NC_029263.1                     |
|                 | <i>Chondrus crispus</i>           | XP_005718310.1                  |
|                 | <i>Porphyra umbilicalis</i>       | OSX69288.1                      |
|                 | <i>Porphyra umbilicalis</i>       | OSX69364.1                      |
|                 | <i>Ectocarpus siliculosus</i>     | Esi0227_0052.1                  |
|                 | <i>Ectocarpus siliculosus</i>     | Esi0225_0050.1                  |
|                 | <i>Ectocarpus siliculosus</i>     | Esi0000_0111.1                  |
| R proteins      | <i>Arabidopsis thaliana</i>       | NP_193428.2                     |
|                 | <i>Arabidopsis thaliana</i>       | NP_001031652.1                  |
|                 | <i>Chromochloris zofingiensis</i> | UNPLg00039.t1                   |
|                 | <i>Chromochloris zofingiensis</i> | UNPLg00131.t1                   |
|                 | <i>Chromochloris zofingiensis</i> | UNPLg00134.t1                   |
|                 | <i>Chromochloris zofingiensis</i> | UNPLg00127.t1                   |
|                 | <i>Porphyra umbilicalis</i>       | OSX80423.1                      |
|                 | <i>Ectocarpus siliculosus</i>     | Esi0015_0171.1                  |
|                 | <i>Ectocarpus siliculosus</i>     | Esi0104_0065.1                  |
|                 | <i>Porphyra umbilicalis</i>       | OSX80000.1                      |
|                 | <i>Ectocarpus siliculosus</i>     | Esi0000_0412.1                  |
|                 | <i>Porphyra umbilicalis</i>       | OSX80299.1                      |
|                 | <i>Porphyra umbilicalis</i>       | OSX79821.1                      |
|                 | <i>Ectocarpus siliculosus</i>     | Esi0000_0090.1                  |
|                 | <i>Porphyra umbilicalis</i>       | OSX80057.1                      |
|                 | <i>Porphyra umbilicalis</i>       | OSX77688.1                      |
| RBOH            | <i>Arabidopsis thaliana</i>       | NC_003076.8                     |

|                    |                                   |                |
|--------------------|-----------------------------------|----------------|
|                    | <i>Arabidopsis thaliana</i>       | NC_003070.9    |
|                    | <i>Zea mays</i>                   | NC_024461.2    |
|                    | <i>Oryza sativa</i>               | NC_029259.1    |
|                    | <i>Chlamydomonas reinhardtii</i>  | XM_001691803.1 |
|                    | <i>Chlamydomonas reinhardtii</i>  | XM_001691804.1 |
|                    | <i>Chondrus crispus</i>           | XP_005718545.1 |
|                    | <i>Porphyra umbilicalis</i>       | OSX69091.1     |
|                    | <i>Porphyra umbilicalis</i>       | OSX73467.1     |
|                    | <i>Phaeodactylum tricornutum</i>  | XP_002179812.1 |
| Cellulase          | <i>Arabidopsis thaliana</i>       | NM_001036005.2 |
|                    | <i>Arabidopsis thaliana</i>       | NC_003076.8    |
|                    | <i>Oryza sativa</i>               | KF214526.1     |
|                    | <i>Zea mays</i>                   | NM_001138649.1 |
|                    | <i>Zea mays</i>                   | XM_008680545.2 |
|                    | <i>Monoraphidium neglectum</i>    | XM_014049505.1 |
|                    | <i>Micromonas commoda</i>         | XM_002501438.1 |
|                    | <i>Chondrus crispus</i>           | XP_005717153.1 |
|                    | <i>Gracilariopsis chorda</i>      | PXF45766.1     |
| Protease inhibitor | <i>Arabidopsis thaliana</i>       | NC_003070.9    |
|                    | <i>Oryza sativa</i>               | NC_029257.1    |
|                    | <i>Oryza sativa</i>               | NC_029261.1    |
|                    | <i>Chromochloris zofingiensis</i> | NW_001843709.1 |
|                    | <i>Arabidopsis thaliana</i>       | NC_003076.8    |
|                    | <i>Chlorella variabilis</i>       | NW_005435085.1 |
|                    | <i>Volvox carteri</i>             | NW0033077870.1 |
|                    | <i>Chondrus crispus</i>           | XP_005717409.1 |
|                    | <i>Porphyra umbilicalis</i>       | OSX79466.1     |
|                    | <i>Porphyra umbilicalis</i>       | OSX71446.1     |
